# Supplementary material for: Interdependence of PRC1 and PRC2 for recruitment to Polycomb Response Elements
Source: PubMed Central journal article supplement (PMC5137424; doi:10.1093/nar/gkw701), 2016-08-23
Supplement: supp_gkw701_nar-00469-x-2016-File008.pdf [file supp_gkw701_nar-00469-x-2016-File008.pdf]

## **Interdependence of PRC1 and PRC2 for recruitment to Polycomb Response Elements**

Tatyana G. Kahn<sup>1</sup>, Eshagh Dorafshan<sup>1</sup>, Dorothea Schultheis<sup>2</sup>, Aman Zare<sup>1</sup>, Per Stenberg<sup>1,3</sup>,  
Ingolf Reim<sup>2</sup>, Vincenzo Pirrotta<sup>4</sup> and Yuri B. Schwartz<sup>1#</sup>

1. Department of Molecular Biology, Umeå University, Umeå, Sweden
2. Friedrich-Alexander University of Erlangen-Nürnberg, Department of Biology, Division of Developmental Biology, Erlangen, Germany
3. Division of CBRN Defense and Security, Swedish Defense Research Agency, FOI, Umeå, Sweden
4. Department of Molecular Biology and Biochemistry, Rutgers University, Piscataway, New Jersey, USA

# Correspondence should be addressed to: [yuri.schwartz@umu.se](mailto:yuri.schwartz@umu.se)

### **Supplementary materials.**

1. Supplementary figure legends
2. Nine supplementary figures
3. Five supplementary tables

## Supplementary figure legends

**Figure S1. Ablation of PRC1 or PRC2 does not lead to major changes in expression of PcG genes.** RT-qPCR analyses indicate that there is no major difference in the expression of PcG genes in different cultured cell lines. Most importantly the differences in gene expression do not correlate with major effects on the corresponding protein levels (compare to Figure 1B). The bars indicate the mean of two independent experiments and whiskers show the scatter.

**Figure S2. Schematic of PcG target genes selected for ChIP-qPCR analyses.** Gene exons are shown as grey boxes, the introns are indicated with broken lines and the adjacent genomic DNA is shown as straight lines. The schematics are drawn to different scales indicated with bars above each gene. The positions of PCR amplicons used for the analyses are marked with numbered arrows. The arrows labeled with “1” correspond to amplicons from PRE cores, the arrows labeled with “2” mark the amplicons to assay H3K27me3 and H2AK118ub. **A.** Genes with PRC2:PRC1 dependent PREs. **B.** Genes with PRC2:PRC1 independent PREs. Note the two alternative TSS of *lov* gene.

**Figure S3. PRC1 ablation does not lead to strong transcription through PREs, ASH1 binding or general strong activation of PcG target genes.** **A.** The transcription through PREs was assayed by RT-qPCR. Here and in **B** and **C** the histograms show the mean of two independent experiments with error bars indicating the scatter. The NC (Negative Control) values are for a short amplicon from the intergenic region of Chromosome 3L and indicate the detection threshold for the assay. **B.** Expression of selected PcG target genes. **C.** The binding of ASH1 to PREs as assayed by ChIP-qPCR. The PC (Positive Control) values are for a short amplicon from transcriptionally active PcG target gene *pointed* (*pnt*).

**Figure S4. The ablation of PRC1 does not affect untargeted di-methylation of H3K27 by PRC2.** **A.** Two-fold dilutions of acid-extracted histones from control *Ras3* and *Psc/Su(z)2* mutant cell lines were analyzed by western-blot with antibodies against H3K27me2 and H3K27me3. Note that the ablation of *Psc/Su(z)2* has no significant effect on the overall H3K27me2/me3, which suggests that much of the bulk H3K27me3 is produced by untargeted PRC2 activity and that the integrity and the activity of PRC2 *per se* do not require PRC1. **B.** H3K27me2 in the vicinity of PREs as measured by ChIP-qPCR. Histograms show the mean of two independent experiments with error bars indicating the scatter. Note that in PRC1 deficient cells the loss of H3K27me3 from the vicinity of PRC2:PRC1 dependent PREs (light gray box) leads to di-methylation of H3K27 by untargeted PRC2. In contrast, since the levels of H3K27me3 around PRC2:PRC1 independent PREs (dark grey box) in PRC1 deficient cells remain high no H3K27me2 is added. The high levels of H3K27me2 at “Control” amplicon from transcriptionally inactive intergenic region on Chromosome 3L are similar in *Ras3* and *Psc/Su(z)2* minus cells.

**Figure S5. Inhibition of transcriptional elongation has no detectable effect on E(z) binding at PREs.** **A.** Nuclear extracts from DRB- or mock-treated *Psc/Su(z)2* minus cells were analyzed by western-blot with antibodies against hypophosphorylated isoform of RNA Polymerase II (RNAPII) or RNA Polymerase II phosphorylated at Serine 2 (RNAPII Ser2-P). Note that the DRB treatment leads to ~10-fold reduction of the RNAPII Ser2-P and increases the level of unphosphorylated RNAPII. **B.** Coomassie stained SDS-PAGE gels of the corresponding nuclear extracts were used as loading control. **C.** RT-qPCR analysis of unspliced RNAs from house-keeping *Taf4* gene and derepressed PcG targets *oc* and *srp* genes indicates that DRB treatment inhibits transcription. Blue bars indicate the number of cDNA molecules in samples from DRB treated *Psc/Su(z)2* minus cells and green bars show the number of cDNA molecules in mock-treated control. The copy numbers were derived by

comparing the Ct values in the RT-qPCR reactions to those in reactions with serial dilution of genomic DNA of known concentration. Here and in **D** the histograms show the mean of two independent experiments with error bars indicating the scatter. **D**. Despite dramatic reduction of RNAPII Ser2-P and inhibition of transcription the ChIP-qPCR signals for E(z) at PRC2:PRC1-dependent *bxd*-PRE or PRC2:PRC1-independent *HGTX*-PRE remain essentially the same in DRB and mock-treated cells.

**Figure S6. Functional properties of PRC2:PRC1 independent PRE.** **A.** ChIP-seq profiles of E(z) binding within *Doc* cluster in *Ras3* and *Psc/Su(z)2* deficient cells. The binding of E(z) to the PRE upstream of the *Doc1* gene is not affected by PRC1 ablation while the binding to the PRE of the *Doc3* gene is strongly reduced. The positions and the exon structure of annotated transcripts are shown above (transcribed left to right) and below (transcribed right to left) the coordinate scale (in bp). The positions of fragments used for transgenic assays are indicated with colored boxes. **B.** The *Doc* transgenic constructs are shown schematically approximately to scale with P-element ends (arrows), *gypsy* insulator elements (G), *Doc* genomic fragment (grey box), *lacZ* and mini-*white* genes indicated. The positions of PCR amplicons used for ChIP analysis in **D.-G.** are indicated with black lines. **C.** Expression of *white* gene in two independent *Doc1* and three independent *Doc3* transgenic lines. The eye color of male and female flies with one or two copies of transgene are shown in wild-type and *su(Hw)* minus backgrounds. The results for ChIP-qPCR analyses of Pc and H3K27me3 within *Doc1* (**D.-E.**) and *Doc3* (**F.-G.**) transgenic constructs. Third instar larvae homozygous for the transgenic insertions on wild-type background were used for ChIP. Consistently, *Doc1*\* and *Doc3*\* amplicons are immunoprecipitated at an extent comparable to that of the endogenous *bxd*-PRE (*bxd* and *bxd'* amplicons). However, since the *white* gene is shielded from PREs by functional *gypsy* insulator w\* amplicon is not immunoprecipitated.

**Figure S7. Loss of Su(z)12 has no effect on bulk H2AK118ub but impairs the binding of Pcl to PREs.** **A.** Two-fold dilutions of histones acid-extracted from Ras3 and Su(z)12 minus cells were analyzed by western-blot with antibodies against H2AK118ub. Coomassie stained SDS-PAGE gel of the histone samples (below) was used as loading control. **B.** ChIP-qPCR analyses of Pcl at PRC2:PRC1 dependent (light grey box) and PRC2:PRC1 independent (dark grey box) PREs in control Ras3 cells and PRC2 deficient Su(z)12 minus cells.

**Figure S8. Comparison of violin plots of the changes in the number of E(z) and Psc ChIP-seq reads at PREs defined from PcG binding profiles in Ras3 cells.** PREs (n=211) were defined as Psc-bound regions overlapped by Pc- and E(z)-bound regions. Significantly bound regions were defined as clusters of coordinates that are no more than 500bp apart and whose values exceed 2.5 Standard Deviations of genomic mean. Note that 97% of our main PRE set is contained in the PRE set defined from Ras3 profiles. Grey plot indicates the changes in the number of E(z) ChIP-seq reads between Psc/Su(z)2 deficient and Ras3 control cells. White plot indicates the changes in the number of Psc ChIP-seq reads between Su(z)12 minus and Ras3 control cells. The black boxplots span the inter-quartile range. The whiskers indicate the adjacent values plus or minus 1.5 time inter-quartile range. The white circles mark positions of the medians. The scale indicates the changes in sequence read numbers expressed as relative differences (below) or ratios (above). The E(z) violin plot is skewed to the left and has long right tail, which indicates that the majority of the PREs lose the signal when PRC1 is absent but there is a class of PREs that shows little change. The violin plot for Psc is symmetrical and shows no evidence for the two classes of PREs with different dependence on PRC2.

**Figure S9. Loss of Su(z)12 and H3K27me3 does not lead to the re-distribution of major PRC1 binding sites or systematic changes in sequencing assay.** **A.** ChIP-seq profiles of Pc and Psc binding over Chromosome 2L in Ras3 and Su(z)12 minus cells. Note that the pattern

of major ChIP-seq peaks in the two cell lines is very similar. **B.** Cumulative distributions of sequencing reads in chromatin inputs around 122 isolated (>10kb to the nearest neighbor) Psc peaks. The shades around fitted curves indicate 95% confidence interval. Regions underneath Psc peaks are slightly overrepresented in the Input libraries from both cell types. However, the height of the “Input” peak is  $\sim 30$  ( $2^5$ ) times lower than that of the Pc ChIP-seq peak in Figure 6D. **C.** Importantly, there is little difference between cumulative distribution of Input signals from Ras3 and Su(z)12 minus cells. Black dots indicate the differences between corresponding points on fitted curves in **B** and the blue shade indicate the 95% confidence interval for fitting the smooth curve.

Figure S1

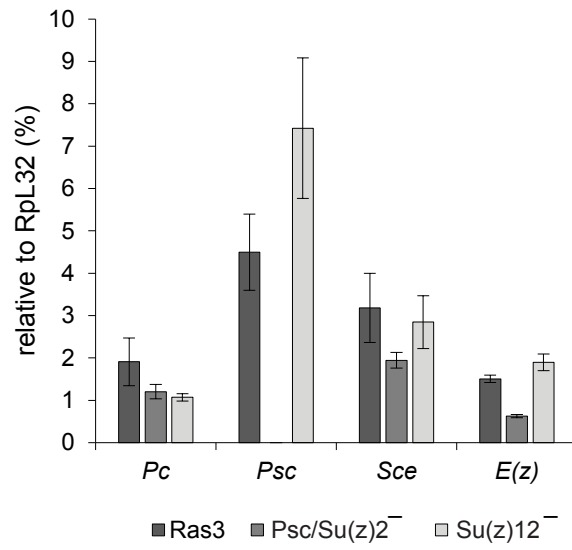

Figure S2

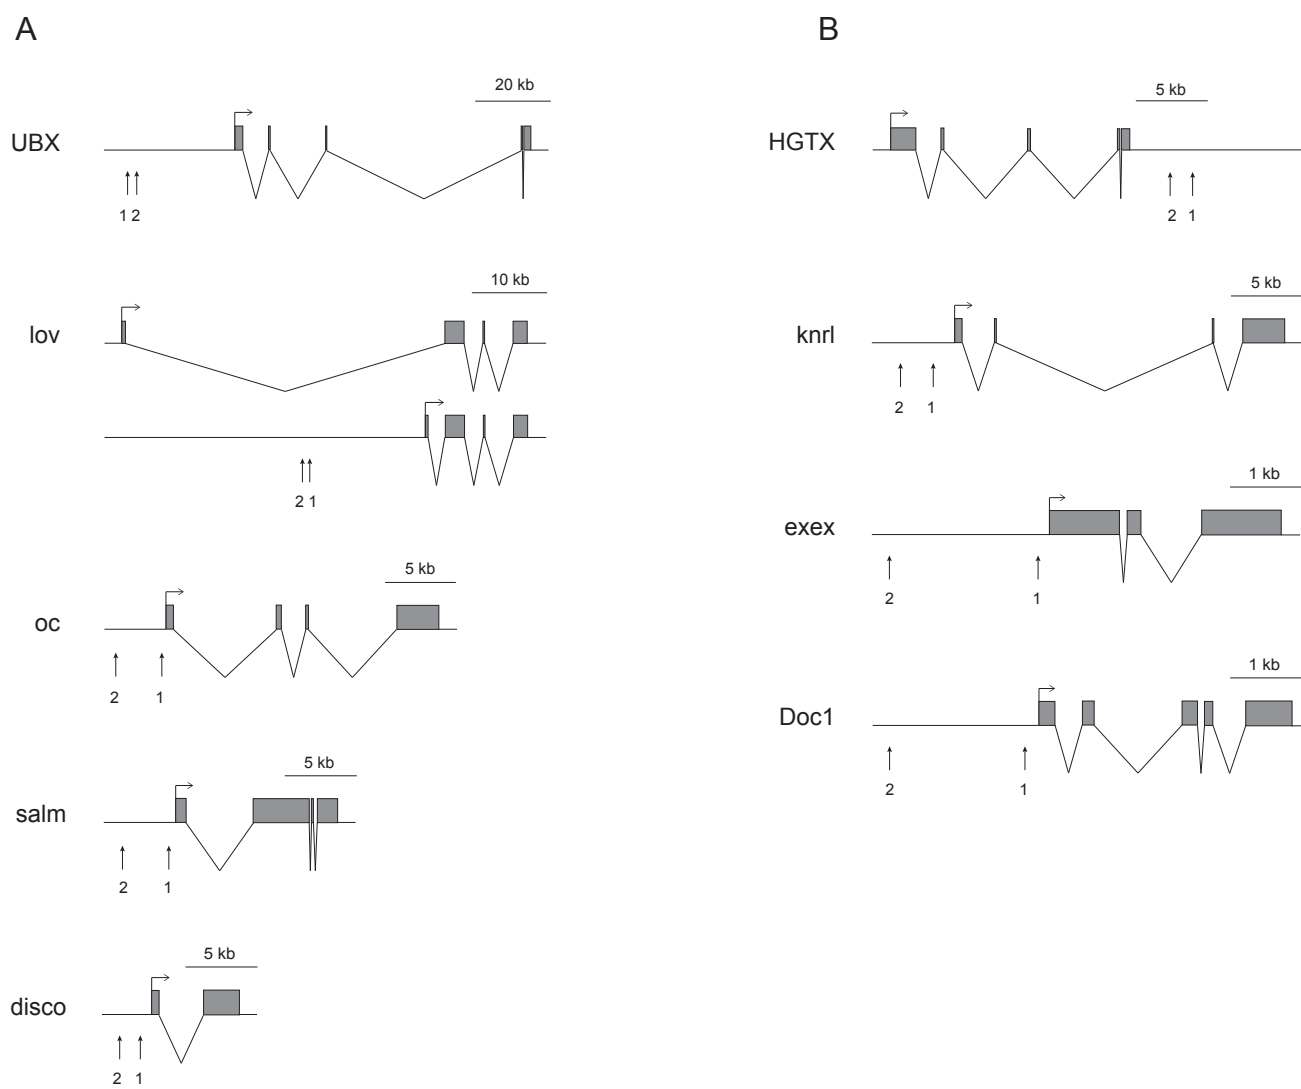



Figure S3

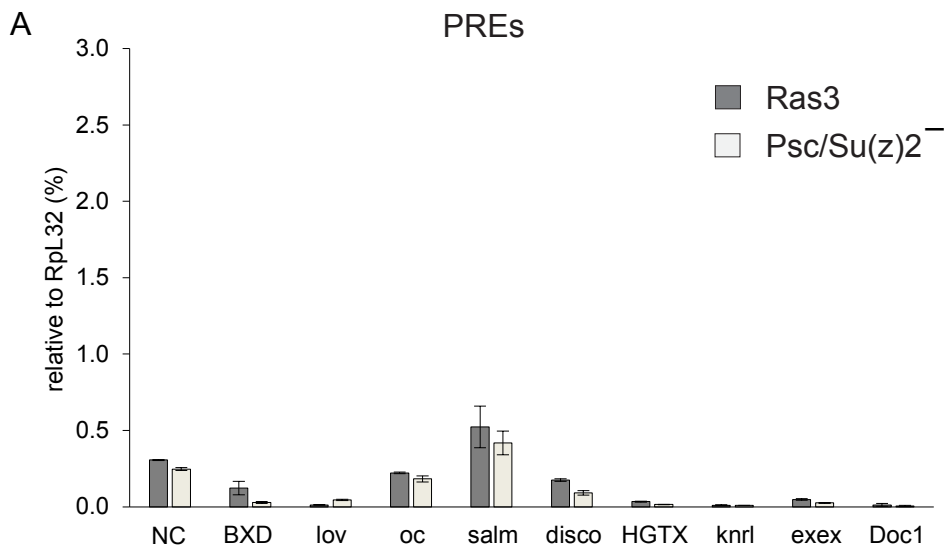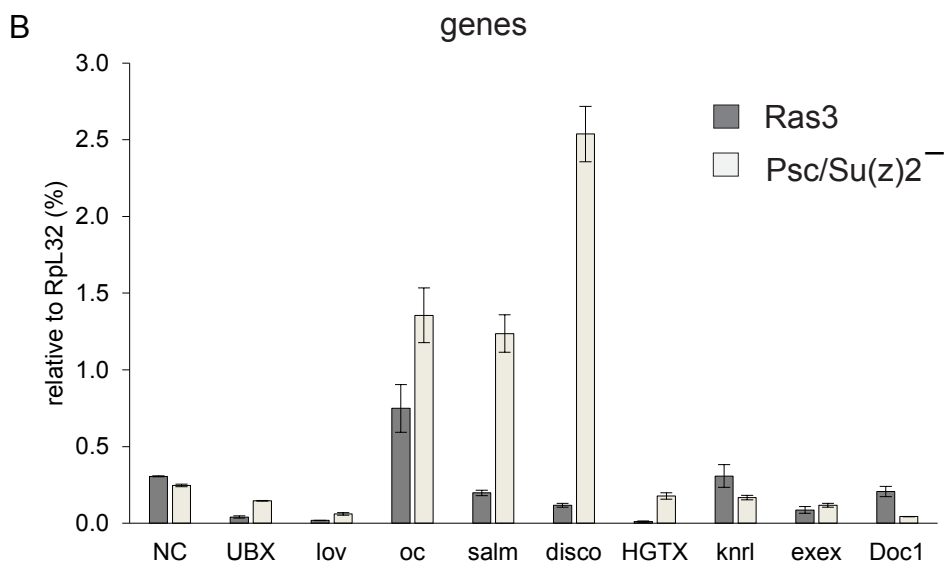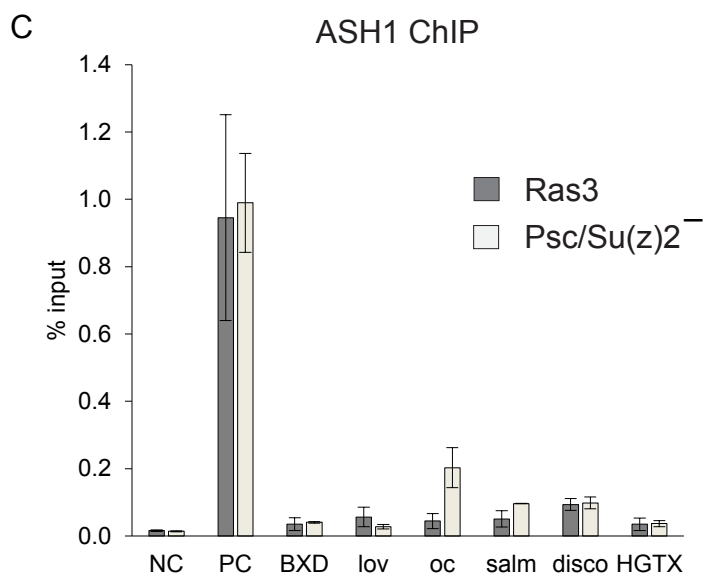

Figure S4

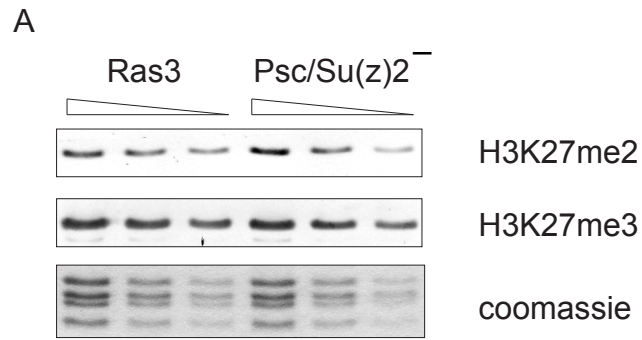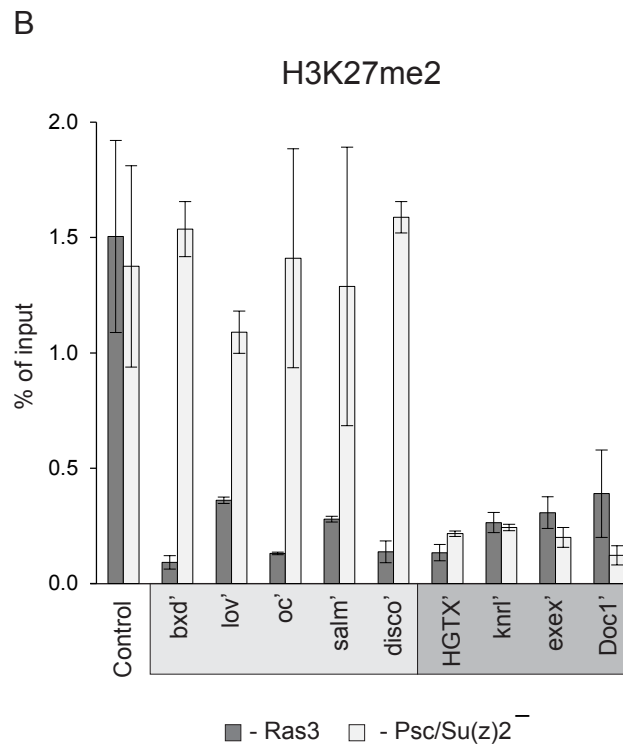

Figure S5

A

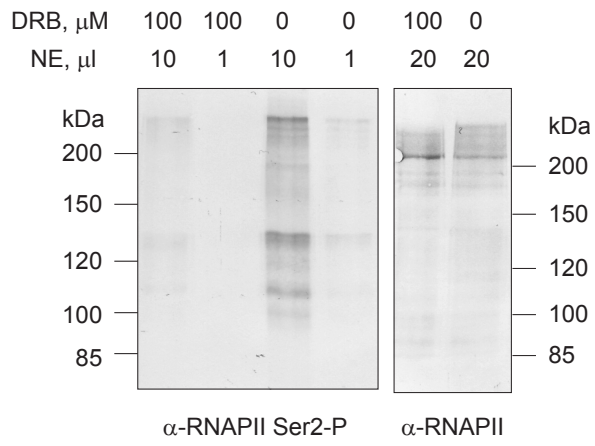

B

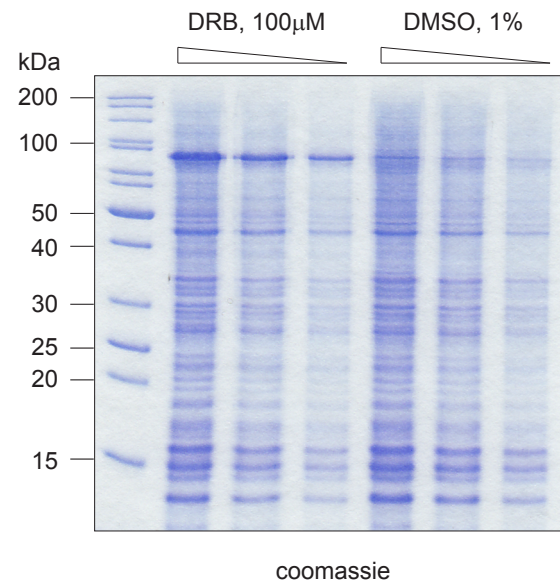

C

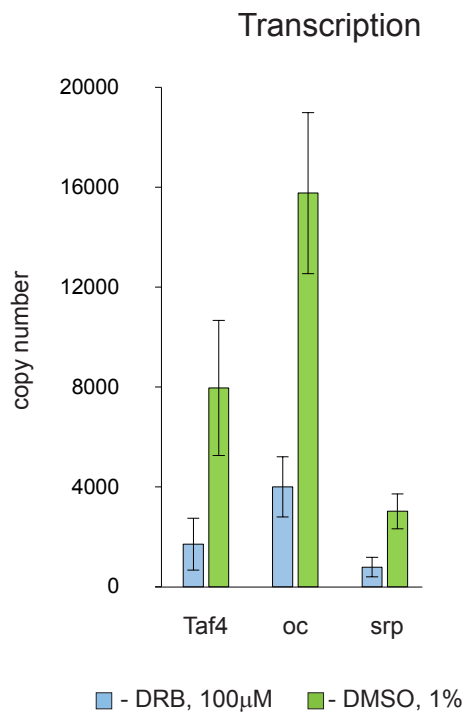

D

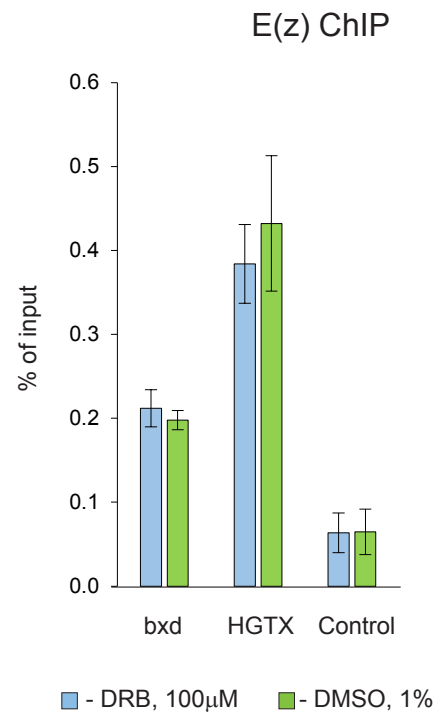

Figure S6

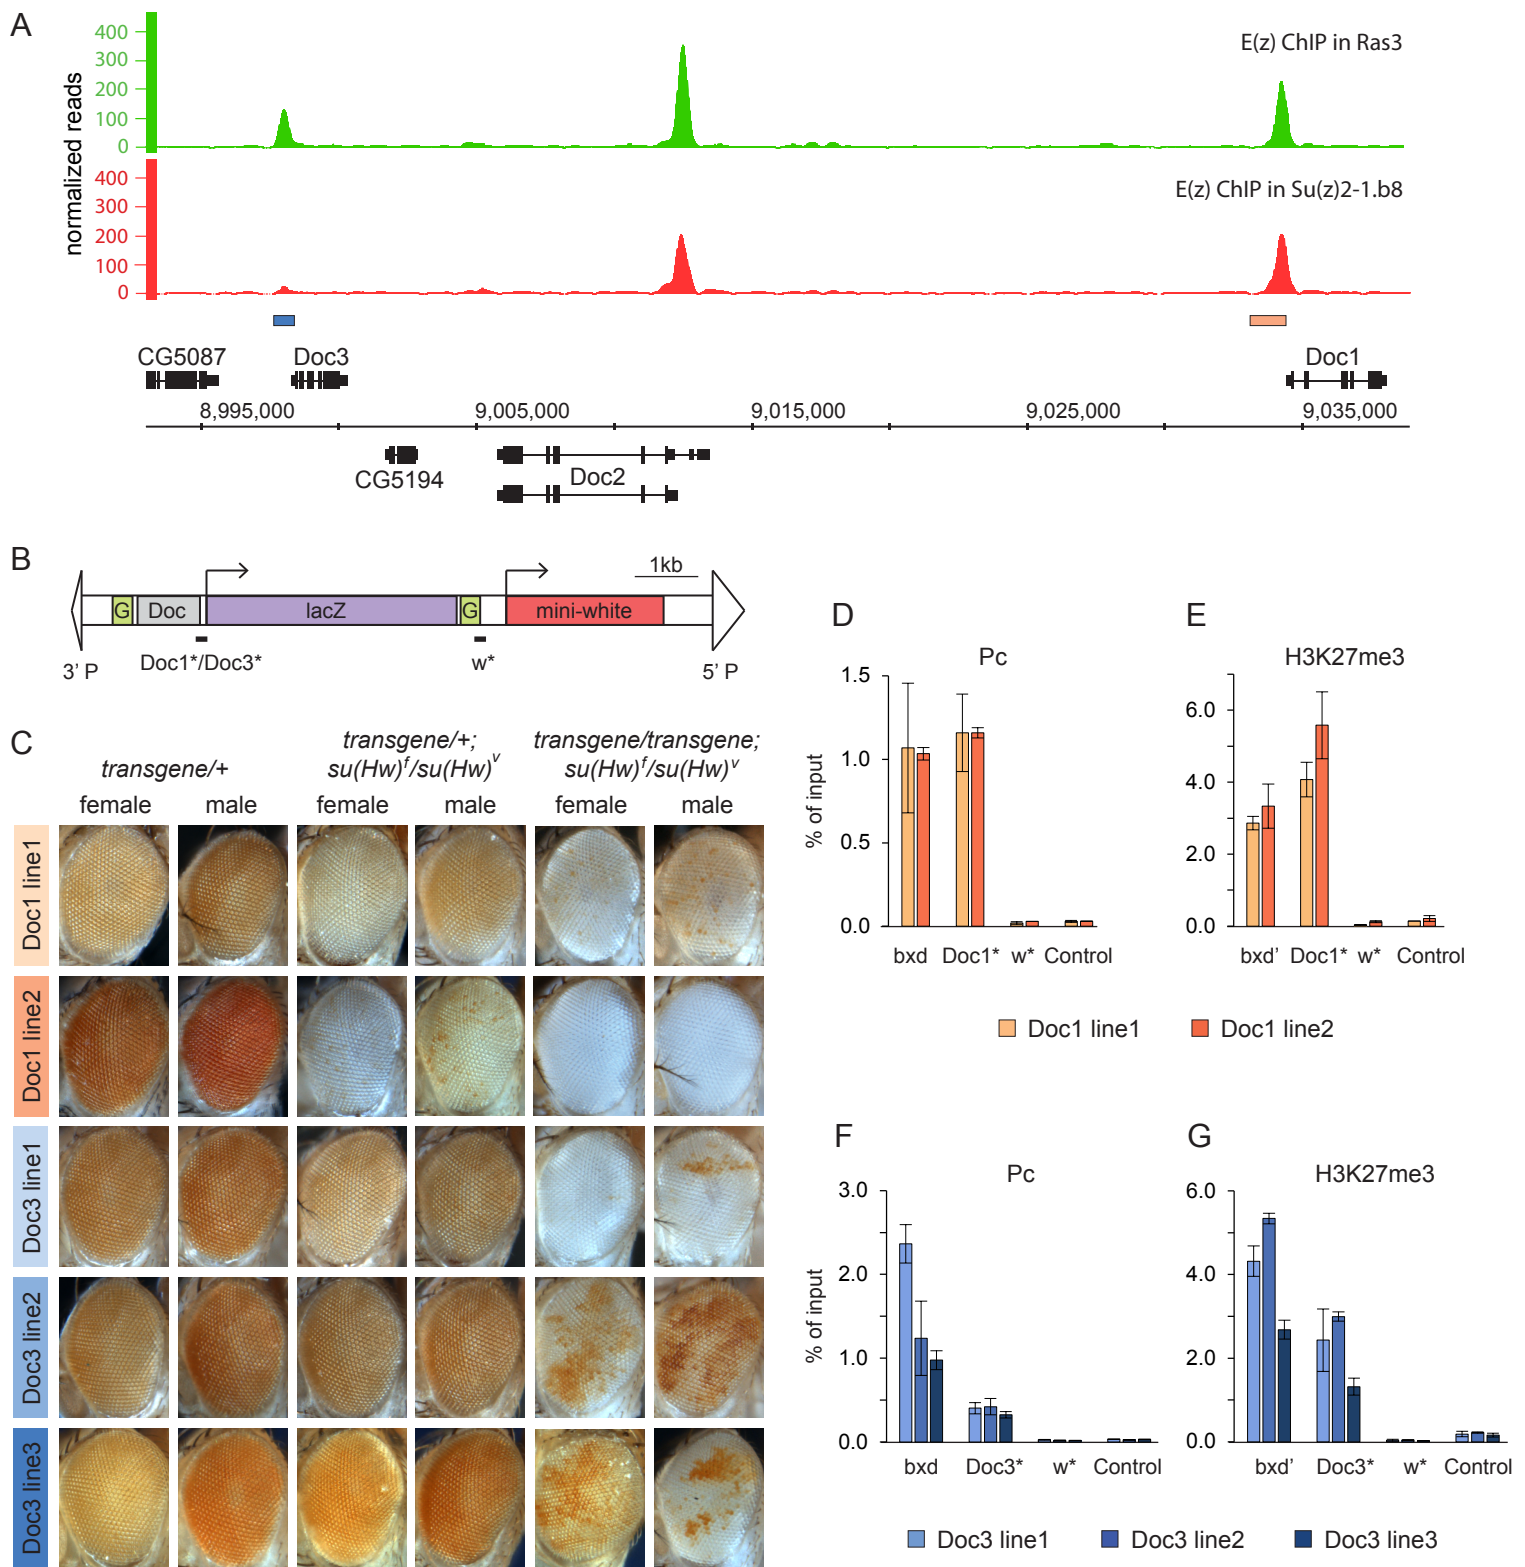

Figure S7

A

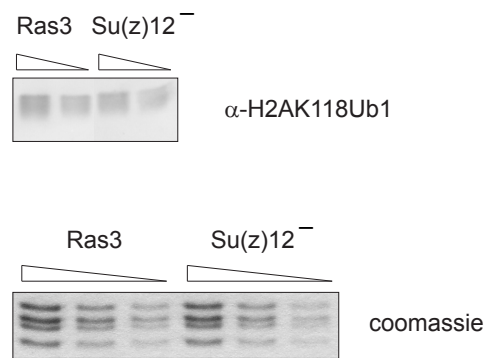

B

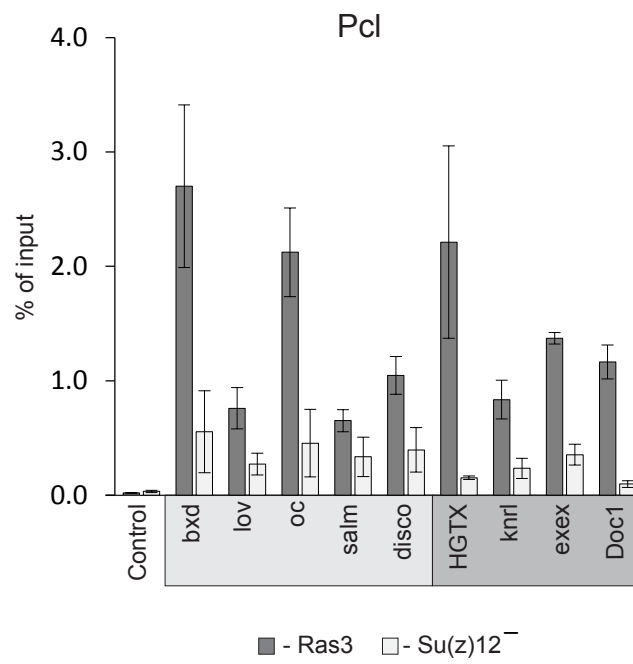

Figure S8

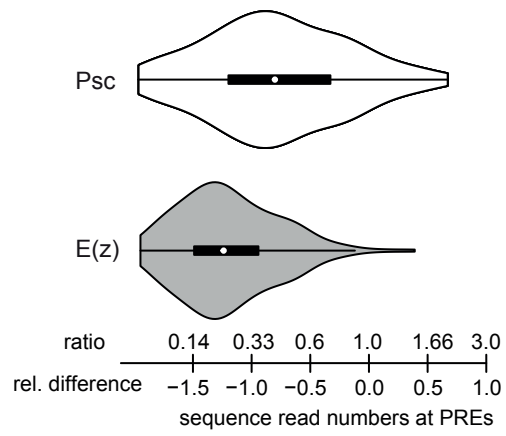

Figure S9

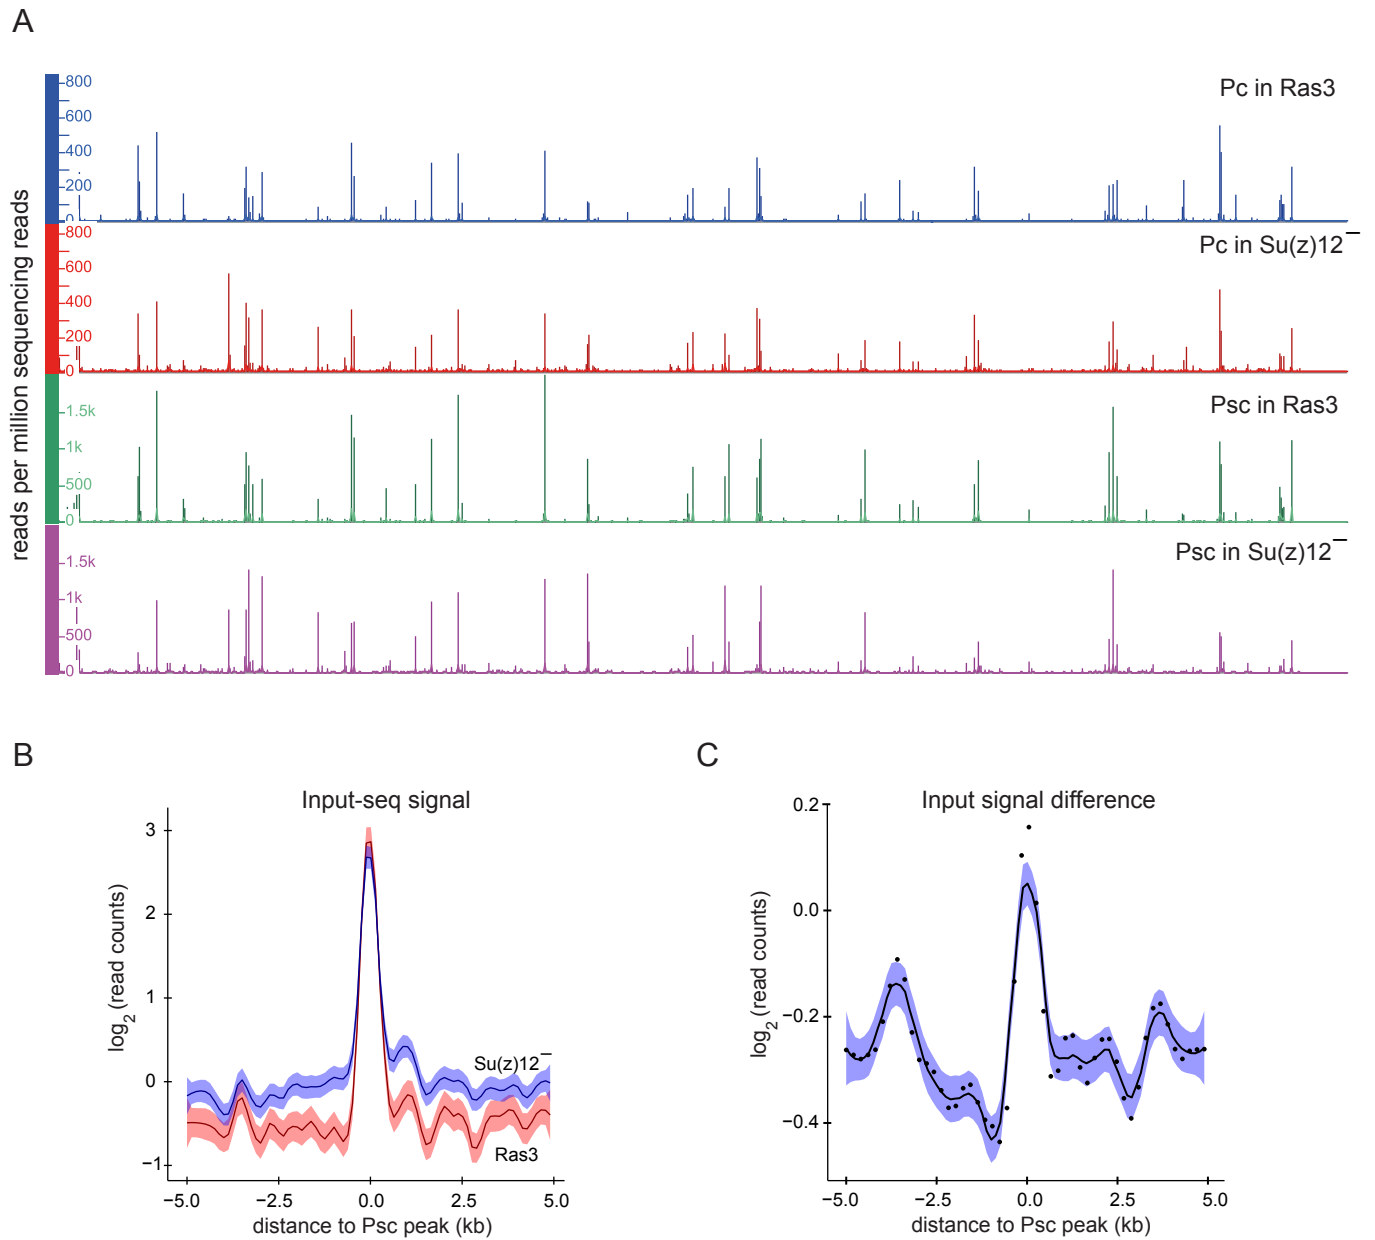

Table S1. The list of oligonucleotide primers

| Amplicon name                    | Primer name    | Primer sequence, 5'-3'                       | T annealing | Product size (bp) |
|----------------------------------|----------------|----------------------------------------------|-------------|-------------------|
| <b>RNAi</b>                      |                |                                              |             |                   |
| <b>RING1-Ri</b>                  | dRingRi1.1     | CTAATACGACTCACTATAGGGAGACACAGTTCTCCTTGAGTGC  | 55          | 951               |
|                                  | dRingRi1.2     | CTAATACGACTCACTATAGGGAGATGCTGAAGAAGACGATGAC  | 55          |                   |
| <b>L(3)73Ah-Ri</b>               | l(3)73Ah-Ri1.1 | CTAATACGACTCACTATAGGGAGCATAACGTGCAAGATCTGCGG | 55          | 817               |
|                                  | l(3)73Ah-Ri1.2 | CTAATACGACTCACTATAGGGAGAGACGAACCTTCAGCGTGTGA | 55          |                   |
| <b>Calypso-Ri</b>                | calypso-Ri1.1  | CTAATACGACTCACTATAGGGAGCGACTTGCCATTCTTAGCGG  | 55          | 857               |
|                                  | calypso-Ri1.2  | CTAATACGACTCACTATAGGGAGAGAACAAGGGGCTGGCTATT  | 55          |                   |
| <b>LZRi</b>                      | LZRi1.1        | CTAATACGACTCACTATAGGGAGGGCCACCGATATTATTTGCC  | 55          | 703               |
|                                  | LZRi1.2        | CTAATACGACTCACTATAGGGAGCACACTGAGGTTTTCCGC    | 55          |                   |
| <b>RT-qPCR</b>                   |                |                                              |             |                   |
| <b>Control</b>                   | RpL32-ex1.1    | TGGGCGATCTCGCCGCAGTA                         | 55          | 174               |
|                                  | RpL32-ex1.2    | CAGAGTGCCTCGCCGCTTCA                         | 55          |                   |
| <b>Pc</b>                        | Pc-ex2.1       | GCCGTAACATAAACTAGCCA                         | 50          | 178               |
|                                  | Pc-ex2.2       | CGAGCCCATAGACTCATTAC                         | 50          |                   |
| <b>RING1</b>                     | dRingEx1.1     | CATTTTCACACCAATTCTGA                         | 55          | 95                |
|                                  | dRingEx1.2     | CGGTCACACTTCAAGCTAAT                         | 55          |                   |
| <b>E(z)</b>                      | EZ-ex1.1       | GATCGCCGGTGACCATCATA                         | 55          | 97                |
|                                  | EZ-ex1.2       | GTTGTGGATGCCACTCGGAA                         | 55          |                   |
| <b>Psc</b>                       | PSCEX1.1       | TCCATTGACCATTGCGACAG                         | 55          | 142               |
|                                  | PSCEX1.2       | TTTCACCTTGATGGGTTTCAG                        | 55          |                   |
| <b>l(3)73Ah</b>                  | l(3)73Ah-ex4.1 | GGGTCGAGCTAACCCTGT                           | 55          | 121               |
|                                  | l(3)73Ah-ex4.2 | GGTTTCGAGGGGACTAACCT                         | 55          |                   |
| <b>Calypso</b>                   | Calypso-ex2.1  | CTCATGCCTTTGGTGTGGGT                         | 55          | 142               |
|                                  | Calypso-ex2.2  | CCAGCATTTTCTCGCCAG                           | 55          |                   |
| <b>UBX</b>                       | U-ex1.1        | GTCTTTGTAGCCATTCACCG                         | 55          | 155               |
|                                  | U-ex1.2        | CCCTATGCCAACCCATC                            | 55          |                   |
| <b>lov</b>                       | Tkr-ex1.1      | CCAACCCCGGAAATCCTTGA                         | 63          | 111               |
|                                  | Tkr-ex1.2      | ATCCGGGCTCACAAAATGGT                         | 63          |                   |
| <b>oc</b>                        | oc-ex1.1       | GAGAAGGCCTGCGCGGACAC                         | 55          | 77                |
|                                  | oc-ex1.2       | TCGGGCTACACGGCCTCCAA                         | 55          |                   |
| <b>salm</b>                      | salm-ex1.1     | GCTGCGAGCGGATCCTTCA                          | 55          | 120               |
|                                  | salm-ex1.3     | ACGTTCTGTGTGCGATGCGT                         | 55          |                   |
| <b>disco</b>                     | disco-ex1.1    | CTGAACACCATATTGCAGC                          | 55          | 157               |
|                                  | disco-ex1.2    | GTCAGTTTATCAATCCAGCC                         | 55          |                   |
| <b>HGTX</b>                      | HGTX-ex1.1     | CACCGACTCCTTGACCCTTC                         | 55          | 73                |
|                                  | HGTX-ex1.2     | CTGAGTTTTCTCGGTCCCC                          | 55          |                   |
| <b>knrl</b>                      | knrl-ex1.1     | TAATCCATCCGCTCTCGCC                          | 55          | 129               |
|                                  | knrl-ex1.2     | AACTACCGCCACACTCCAAG                         | 55          |                   |
| <b>exex</b>                      | exex-ex1.1     | GGCCTTTACATCGCAGCAAC                         | 55          | 75                |
|                                  | exex-ex1.2     | CGTTTGGGCCGACTCAGATA                         | 55          |                   |
| <b>Doc1</b>                      | Doc1-ex1.1     | TGAGCTATGGACCCAGTGGA                         | 55          | 140               |
|                                  | Doc1-ex1.2     | CGAGGCCACAGGACTAACAG                         | 55          |                   |
| <b>Taf4 (nascent transcript)</b> | Taf4-ex-nt1.1  | GTTCCGTTTTGGTTTCGTCACA                       | 55          | 109               |
|                                  | Taf4-ex-nt1.1  | AGACAGTTACACAACGCAGCA                        | 55          |                   |
| <b>oc (nascent transcript)</b>   | oc-His-1.1     | TCCCGCTCCCCAAAACTACT                         | 55          | 82                |
|                                  | oc-His-1.2     | CCAGCAAGGAATGTGGAGCCGA                       | 55          |                   |



|                                 |               |                         |    |     |
|---------------------------------|---------------|-------------------------|----|-----|
| <b>srp (nascent transcript)</b> | srp-1.1       | AGCACCGACTTCCCCACC      | 55 | 204 |
|                                 | srp-1.2       | CAATCAAATGCGGGTTCGCG    | 55 |     |
| <b>ChIP-qPCR</b>                |               |                         |    |     |
| <b>Control</b>                  | 3L-nc-1.1     | AAACTGCCGCACGACGGAGG    | 55 | 82  |
|                                 | 3L-nc-1.2     | CGGCCCTGCAACGCCTGTAA    | 55 |     |
| <b>bxd</b>                      | BP-3          | GCCATAACGGCAGAACCAAAG   | 55 | 258 |
|                                 | BP-4          | ATGAGGCCATCTCAGTCGC     | 55 |     |
| <b>bxd'</b>                     | FM8a.1        | GGAGTAGCGTGCTACGGGGG    | 55 | 81  |
|                                 | FM8a.2        | CGACATGAAATGTTGCACGGCCA | 55 |     |
| <b>lov</b>                      | Tkr-1.1       | CGAACGCTAGGGCAGAAAGA    | 55 | 90  |
|                                 | Tkr-1.2       | CCAACCTCGTGTGCAGCAAAT   | 55 |     |
| <b>lov'</b>                     | Tkr-His1.1    | TGAACAACAGTTCGCCTGGA    | 55 | 70  |
|                                 | Tkr-His1.2    | TGCTTGGTCAAGACTGCGAG    | 55 |     |
| <b>oc</b>                       | oc-1.1        | CTACCGCGCGCCAGAGTGAG    | 55 | 122 |
|                                 | oc-1.2        | AGTCAGGTTGTAAGCGGCGTGC  | 55 |     |
| <b>oc'</b>                      | oc-His2.1     | GGAGGCTAGGTAGGCGTAGA    | 55 | 102 |
|                                 | oc-His2.2     | ATCCCGGTAGCCTTGGTACT    | 55 |     |
| <b>salm</b>                     | salm-1.1      | TCCTTCCGCCTTTTGCGGCTC   | 55 | 120 |
|                                 | salm-1.2      | GGCTCGTTGGCGGGGAAG      | 55 |     |
| <b>salm'</b>                    | salm-His2.1   | TTTGGAGACGTGCCCACTTT    | 55 | 84  |
|                                 | salm-His2.2   | CAACACTCCCCGATTCCAA     | 55 |     |
| <b>disco</b>                    | disco-1.1     | CGCTGCTGCGACGTCACTTT    | 55 | 138 |
|                                 | disco-1.2     | TCGTGCGGGTGCATAGGGA     | 55 |     |
| <b>disco'</b>                   | disco-His-1.1 | GTGCAGCAACCTTTATGCTGCCT | 55 | 150 |
|                                 | disco-His-1.2 | GGCGGCGCCGAATTGAAAAGT   | 55 |     |
| <b>HGTX</b>                     | HGTX-1.1      | CATGACGTGTTGGCATGTCCG   | 55 | 103 |
|                                 | HGTX-1.2      | CACAGAGCGGCTGTAAGTGA    | 55 |     |
| <b>HGTX'</b>                    | HGTX-His1.1   | ATTTAGTGGCCCCATGTCC     | 55 | 72  |
|                                 | HGTX-His1.2   | ATGTCCGTGGAGTGGAGAGA    | 55 |     |
| <b>knrl</b>                     | knrl-1.1      | ATCGTATTAGCGGCTTGCCA    | 55 | 111 |
|                                 | knrl-1.2      | GCTGGAAGTGGGCAATGTTC    | 55 |     |
| <b>knrl'</b>                    | knrl-His1.1   | TCGCCCTTTCTGGTTACAC     | 55 | 122 |
|                                 | knrl-His1.2   | CCGATTCCGCATTCTGCAAG    | 55 |     |
| <b>exex</b>                     | exex-1.1      | TCTGTGCGGCTTTCTGTGTTA   | 63 | 94  |
|                                 | exex-1.2      | GGTGAATCAGTACCGCTCT     | 63 |     |
| <b>exex'</b>                    | exex-His1.1   | CAACGATGACCAAATCGCCC    | 55 | 102 |
|                                 | exex-His1.2   | TGGTCACCGGAAATGGGATG    | 55 |     |
| <b>Doc1</b>                     | Doc1-1.1      | CTCCGCTGCTCACAAAATGG    | 55 | 146 |
|                                 | Doc1-1.2      | GCAGCTACGCTTGAAAACC     | 55 |     |
| <b>Doc1'</b>                    | Doc1-His1.1   | CGAGGGACTTGGATCGTCTG    | 66 | 86  |
|                                 | Doc1-His1.2   | ACTGAGAAGGACGCGACAAG    | 66 |     |
| <b>FM2</b>                      | FM2.1         | TGCTTCTGTTCAATTATTGTCTC | 55 | 213 |
|                                 | FM2.2         | GAGTTCCGTGATTGGATTGC    | 55 |     |
| <b>FM3</b>                      | FM3.1         | GTTTTTCAATATGCCGATTAGC  | 55 | 227 |
|                                 | FM3.2         | AATATAATGTATCTATGAGTCAG | 55 |     |
| <b>FM4</b>                      | FM4.1         | AGCAATTTGTCACCGCAAGG    | 55 | 216 |
|                                 | FM4.2         | GGATTTTGAAGTGCCTTCTTCC  | 55 |     |
| <b>BP</b>                       | BP-3          | GCCATAACGGCAGAACCAAAG   | 55 | 258 |
|                                 | BP-4          | ATGAGGCCATCTCAGTCGC     | 55 |     |
|                                 | FM5.1         | TCTCTCGCTGGTTGTGTTTG    | 55 |     |

|                 |                 |                          |    |     |
|-----------------|-----------------|--------------------------|----|-----|
| <b>FM5</b>      | FM5.2           | CGTGCGGTATGGAGAGATG      | 55 | 189 |
| <b>FM7</b>      | FM7.1           | GGGTCAAAGAACTCGAAATATG   | 55 | 245 |
|                 | FM7.2           | ATTTCAATGTATTCGGTTATTAAG | 55 |     |
| <b>FM8</b>      | FM8a.1          | GGAGTAGCGTGCTACGGGGG     | 55 | 81  |
|                 | FM8a.2          | CGACATGAAATGTTGCACGGCCA  | 55 |     |
| <b>Doc1*</b>    | Doc1-2.1        | GAGTTAGCACTCGAGCGGAG     | 55 | 94  |
|                 | pH-Pelican-REV1 | ATTTATACTCCGGCGCTCCT     | 55 |     |
| <b>Doc3*</b>    | Doc3-1.1        | GTGTTCCAGACGTCGATTGC     | 55 | 112 |
|                 | Pelican-REV1    | TGCTTTAGCAGGCTCTTTTCG    | 55 |     |
| <b>w*</b>       | Pelican-FWD1    | TGCCATACCATTTAGCCGATCA   | 55 | 125 |
|                 | Pelican-REV2    | AGTTCAATGATGTCCAGTGCAG   | 55 |     |
| <b>BXD*</b>     | attB_BXD-PRE-1- | CAAGCGGGCAGCATAAAAC      | 55 | 161 |
|                 | w-prom1         | CTGCACTGGATATCATTGAAC    | 55 |     |
| <b>HGTX*</b>    | HGTX-2.1        | CTCAGTCGCATGATATCCCT     | 55 | 288 |
|                 | w-prom1         | CTGCACTGGATATCATTGAAC    | 55 |     |
| <b>knrl*</b>    | knrl-2.1        | TCGACCGTATGGTAATCGCT     | 55 | 276 |
|                 | w-prom1         | CTGCACTGGATATCATTGAAC    | 55 |     |
| <b>control*</b> | 3Lnc-1.3        | GATGGAGCGACACGATAGCA     | 55 | 160 |
|                 | w-prom1         | CTGCACTGGATATCATTGAAC    | 55 |     |
| <b>pnt</b>      | pnt-1.1         | GCCCAGTCCCAGCGAAGCAG     | 55 | 85  |
|                 | pnt-1.2         | GCAGGGATTCGCCAACGGGA     | 55 |     |

**Table S2. The list of antibodies**

| Antigene                                           | Epitope, aa / clone name | Type of antibody  | Reference/Company/Catalog#                                      | Western dilution | Amount used for ChIP |
|----------------------------------------------------|--------------------------|-------------------|-----------------------------------------------------------------|------------------|----------------------|
| E(z)                                               | 8-190                    | rabbit polyclonal | Kahn et al., 2006                                               | 1:1000           | 3ug                  |
| Pcl                                                | 191-354                  | rabbit polyclonal | Poux et al., 2001                                               | 1:1000           | 3ug                  |
| Psc                                                | 819-926                  | rabbit polyclonal | Poux et al., 2001                                               | 1:2000           | 2ug                  |
| Pc                                                 | 191-354                  | rabbit polyclonal | Poux et al., 2001                                               | 1:2000           | 2ug                  |
| Pcl                                                | 113-537                  | rabbit polyclonal | O'Connell et al., 2001                                          | 1:2000           | 5ug                  |
| dRING_Q3200                                        |                          | rabbit polyclonal | modENCODE Consortium et al., 2010                               | 1:5000           | 5ug                  |
| dSfmbt_Q2642                                       | 14-113                   | rabbit polyclonal | modENCODE Consortium et al., 2010                               | 1:3000           |                      |
| Pho                                                | 93-276                   | rabbit polyclonal | Poux et al., 2001                                               |                  | 50ul                 |
| Ash1                                               | 1756-1855                | rabbit polyclonal | this study, validated by ChIP in Ash1 deficient cultured cells* |                  | 5ug                  |
| H3K27me3                                           |                          | mouse monoclonal  | Abcam, #ab6002, lot#GR77445-3, 1ug/ul                           |                  | 0.5ug                |
| H3K27me3                                           |                          | rabbit polyclonal | Upstate, #07-449                                                | 1:4000           |                      |
| Di-methyl-Histone H3 (K27)                         |                          | rabbit moloclonal | Cell Signaling, #9728S, Lot#4                                   | 1:3000           | 3ul                  |
| H3K27me1                                           |                          | rabbit polyclonal | Diagenode, #pAb-045-050                                         | 1:1000           |                      |
| Ubiquityl-Histone H2A (Lys119)                     | D27C4                    | rabbit moloclonal | Cell Signaling, #8240                                           | 1:5000           | 5ug                  |
| H3                                                 |                          | rabbit polyclonal | Abcam, #ab1791                                                  | 1:100000         |                      |
| Anti-RNA polymerase II CTD repeat YSPTSPS antibody | 8WG16                    | mouse monoclonal  | Abcam, ab817                                                    | 1:500            |                      |
| Phospho-Rpb1 CTD (Ser2)                            | E1Z3G                    | rabbit moloclonal | Cell Signaling, #13499                                          | 1:5000           |                      |

\* validation of anti-Ash1 antibodies, 3L-nc1 - intergenic region, BXD-PRE - PRE in repressed state, pnt - PcG target gene in active state

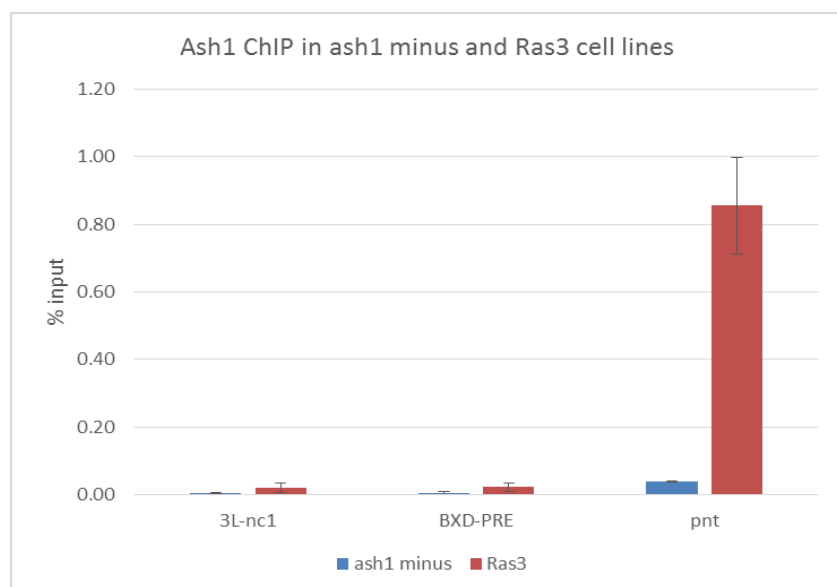

**Table S3. Relative differences in E(z) ChIP-seq signals at PREs between Su(z)2-1.b8 and Ras3 cells**

| PRE position* |          |          | Relative difference in sequencing reads between Su(z)2-1.b8 and Ras3 cells (average for two biological replicates) |                   | corrsponding PcG target gene |
|---------------|----------|----------|--------------------------------------------------------------------------------------------------------------------|-------------------|------------------------------|
| chromosome    | start    | stop     | for E(z) ChIP samples                                                                                              | for Input samples |                              |
| chr2L         | 15111038 | 15112038 | 0.39023719                                                                                                         | -0.01351885       | CG15269                      |
| chr2R         | 20229351 | 20230351 | 0.097082462                                                                                                        | -0.034390109      | bs                           |
| chr2L         | 5290     | 6290     | -0.048085475                                                                                                       | -0.218056837      | CG11023                      |
| chr3L         | 9033540  | 9034540  | -0.146171061                                                                                                       | -0.192901096      | Doc1                         |
| chr3R         | 12239121 | 12240121 | -0.24052466                                                                                                        | 0.043769344       | ss                           |
| chr3L         | 7940403  | 7941403  | -0.240958253                                                                                                       | -0.14627894       | exex                         |
| chr3L         | 20614587 | 20615587 | -0.308328587                                                                                                       | -0.304758214      | knrl                         |
| chr3R         | 20920186 | 20921186 | -0.342738266                                                                                                       | 0.10997004        | fd96cb                       |
| chr2R         | 13709561 | 13710561 | -0.445441055                                                                                                       | -0.126968917      | grh                          |
| chr3R         | 17204463 | 17205463 | -0.458656895                                                                                                       | -0.312949116      | tin                          |
| chr2R         | 18129478 | 18130478 | -0.507332065                                                                                                       | 0.095605387       | dve                          |
| chr3R         | 678193   | 679193   | -0.532301721                                                                                                       | -0.302185899      | opa                          |
| chr2L         | 18881109 | 18882109 | -0.563348014                                                                                                       | 0.075588434       | tup                          |
| chr3L         | 9011622  | 9012622  | -0.584378297                                                                                                       | -0.494220062      | Doc2                         |
| chr3R         | 12248773 | 12249773 | -0.590498191                                                                                                       | -0.239186458      | ss                           |
| chr2L         | 1972530  | 1973530  | -0.599212497                                                                                                       | -0.167568879      | CG31670                      |
| chr3R         | 17386852 | 17387852 | -0.624059626                                                                                                       | -0.274435573      | slou                         |
| chr3L         | 14170673 | 14171673 | -0.638136678                                                                                                       | 0.034043334       | D                            |
| chr3R         | 7179390  | 7180390  | -0.650022226                                                                                                       | -0.556394677      | Pros                         |
| chrX          | 4305183  | 4306183  | -0.651350319                                                                                                       | -0.164353972      | bi                           |
| chr2R         | 10686482 | 10687482 | -0.683458384                                                                                                       | -0.332889313      | kn                           |
| chr3L         | 12572833 | 12573833 | -0.704964319                                                                                                       | -0.332643806      | ara                          |
| chr3R         | 9726877  | 9727877  | -0.720880465                                                                                                       | -0.396605191      | ems                          |
| chr2R         | 5082022  | 5083022  | -0.722936592                                                                                                       | 0.259843872       | unpg                         |
| chr2L         | 3606249  | 3607249  | -0.729891722                                                                                                       | -0.063920017      | odd                          |
| chr3L         | 12427253 | 12428253 | -0.733112715                                                                                                       | 0.08563378        | toe                          |
| chr3L         | 19656435 | 19657435 | -0.741318843                                                                                                       | -0.053955474      | tey                          |
| chr3L         | 14571686 | 14572686 | -0.779625249                                                                                                       | 0.251986833       | HGTX                         |
| chr3R         | 2567414  | 2568414  | -0.779969275                                                                                                       | -0.385529821      | pb                           |
| chr2R         | 20701204 | 20702204 | -0.791195045                                                                                                       | -0.217486849      | Dll                          |
| chr3R         | 8889403  | 8890403  | -0.796388378                                                                                                       | -0.228593737      | sim                          |
| chr3L         | 3845599  | 3846599  | -0.890469205                                                                                                       | -0.405701341      | Awh                          |
| chr3R         | 20906136 | 20907136 | -0.926565344                                                                                                       | 0.088469468       | fd96Ca                       |
| chr3R         | 17324852 | 17325852 | -0.931964925                                                                                                       | -0.273970898      | C15                          |
| chr2R         | 21002787 | 21003787 | -0.940912399                                                                                                       | -0.132848968      | Tkr                          |
| chr3R         | 12229023 | 12230023 | -0.953218765                                                                                                       | -0.097504979      | ss                           |
| chr2L         | 3824916  | 3825916  | -0.959350661                                                                                                       | -0.040952295      | slp1                         |
| chr2L         | 6820973  | 6821973  | -0.959556678                                                                                                       | 0.021715579       | sens-2                       |
| chr3R         | 660532   | 661532   | -0.966717636                                                                                                       | -0.33288126       | opa                          |

|       |          |          |              |              |                |
|-------|----------|----------|--------------|--------------|----------------|
| chr3R | 9700307  | 9701307  | -0.970480185 | -0.340556415 | E5             |
| chr2L | 3835576  | 3836576  | -0.976351823 | 0.064117961  | slp2           |
| chr3L | 6896535  | 6897535  | -0.987929551 | -0.297915519 | Prat2          |
| chr3L | 14592362 | 14593362 | -0.988768668 | -0.49702735  | HGTX           |
| chr3R | 6442098  | 6443098  | -1.008346711 | -0.441904109 | hth            |
| chr3L | 14124366 | 14125366 | -1.026474249 | -0.275327043 | Sox21b         |
| chr3L | 12602148 | 12603148 | -1.037450207 | -0.346457885 | caup           |
| chr2R | 20948836 | 20949836 | -1.06871344  | 0.140107742  | gsb            |
| chr3R | 13382892 | 13383892 | -1.100189853 | -0.149261103 | Hmx            |
| chrX  | 8518322  | 8519322  | -1.104908761 | 0.176867531  | oc             |
| chr2R | 3305913  | 3306913  | -1.138185193 | -0.819984423 | so             |
| chr2R | 10345135 | 10346135 | -1.150461159 | -0.071867133 | Oaz            |
| chrX  | 5895108  | 5896108  | -1.170667762 | 0.393398124  | CG4766         |
| chr3R | 11851364 | 11852364 | -1.173897328 | -0.239905627 | pnr            |
| chr3R | 17259534 | 17260534 | -1.17425819  | 0.134247764  | lbl            |
| chr3R | 4016246  | 4017246  | -1.175809259 | 0.130412603  | grn            |
| chr2L | 16485973 | 16486973 | -1.188214235 | -0.344115376 | dac            |
| chr3R | 2503774  | 2504774  | -1.194994244 | -0.297639164 | lab            |
| chr3L | 8997729  | 8998729  | -1.199786184 | -0.686166533 | Doc3           |
| chr3L | 12460807 | 12461807 | -1.202986735 | -0.072774107 | eyg            |
| chr2L | 3662269  | 3663269  | -1.203261154 | -0.116965128 | CG34340        |
| chr3R | 8106072  | 8107072  | -1.208119217 | -0.17141146  | svp            |
| chr2L | 18795571 | 18796571 | -1.222544203 | -0.315577151 | ham            |
| chr3R | 4006950  | 4007950  | -1.226011975 | -0.477552043 | grn            |
| chr2R | 16790601 | 16791601 | -1.230276343 | -0.688230304 | otp            |
| chrX  | 5907251  | 5908251  | -1.233912713 | 0.26462187   | mab-21         |
| chr3R | 25516149 | 25517149 | -1.235126263 | -0.065657068 | dmrt99B        |
| chr3L | 12645981 | 12646981 | -1.240544024 | -0.051058026 | CR43431        |
| chr2L | 12617692 | 12618692 | -1.250687491 | -0.253112832 | nub            |
| chr3R | 12589291 | 12590291 | -1.254781686 | 0.110758504  | Ubx (bx-d-PRE) |
| chr3L | 21472597 | 21473597 | -1.271919049 | 0.084566739  | croc           |
| chr2R | 21102468 | 21103468 | -1.279815745 | -0.077983774 | Kr             |
| chrX  | 8700536  | 8701536  | -1.280496984 | 0.279502238  | Lim1           |
| chr4  | 528607   | 529607   | -1.286536632 | 0.097417561  | zfh2           |
| chr3R | 24372594 | 24373594 | -1.292441226 | -0.067522851 | fkh            |
| chr2R | 8771483  | 8772483  | -1.29991978  | -0.228004619 | vg             |
| chr2L | 5460902  | 5461902  | -1.302647643 | 0.052586652  | mid            |
| chr2L | 5403363  | 5404363  | -1.304611626 | -0.276189883 | H15            |
| chr3L | 12685254 | 12686254 | -1.322299872 | -0.102282151 | mirr           |
| chr2R | 20939693 | 20940693 | -1.324643766 | -0.296817409 | gsb-n          |
| chr3R | 2673473  | 2674473  | -1.338002069 | -0.205305131 | Scr            |
| chr3R | 6490434  | 6491434  | -1.343719028 | -0.607683888 | CG34304        |
| chr2L | 12586427 | 12587427 | -1.345972545 | 0.039139529  | nub            |
| chr2L | 7306432  | 7307432  | -1.351508645 | -0.033981526 | wg             |
| chr2L | 8825422  | 8826422  | -1.356806915 | -0.134081623 | SoxN           |
| chr2L | 6833299  | 6834299  | -1.364783832 | -0.037343626 | sens-2         |
| chr3R | 17271782 | 17272782 | -1.366917594 | -0.221355789 | lbe            |

|       |          |          |              |              |                    |
|-------|----------|----------|--------------|--------------|--------------------|
| chrX  | 16041559 | 16042559 | -1.369688863 | -0.548175747 | disco-r            |
| chr3R | 2718698  | 2719698  | -1.375561182 | -0.320027889 | Antp               |
| chr2L | 5421429  | 5422429  | -1.380129374 | -0.336810952 | H15                |
| chr3R | 26737738 | 26738738 | -1.382238539 | -0.166033215 | Ptx1               |
| chr3R | 2617004  | 2618004  | -1.387264582 | 0.113318701  | Dfd                |
| chr2R | 8791327  | 8792327  | -1.391011281 | -0.503132145 | vg                 |
| chrX  | 17683194 | 17684194 | -1.408436524 | -0.378590855 | OdsH               |
| chr2L | 16422343 | 16423343 | -1.408947542 | -0.320372259 | snoRNA:Me28S-A2958 |
| chr2R | 1613509  | 1614509  | -1.421110672 | -0.510984985 | ap                 |
| chr2R | 7415510  | 7416510  | -1.42328651  | -0.371472843 | en                 |
| chrX  | 8544485  | 8545485  | -1.4339559   | -0.094554267 | oc                 |
| chr2L | 3538793  | 3539793  | -1.435333107 | 0.088275278  | drm                |
| chr2R | 15155951 | 15156951 | -1.436296383 | 0.070163752  | rib                |
| chr3R | 25381426 | 25382426 | -1.443296348 | -0.175228689 | Dr                 |
| chrX  | 5454405  | 5455405  | -1.449234258 | 0.078224444  | Vsx2               |
| chr2L | 594635   | 595635   | -1.449634413 | 0.055208702  | Gsc                |
| chr3R | 12683393 | 12684393 | -1.453591011 | 0.199286604  | Abd-B (iab5-PRE)   |
| chrX  | 5487778  | 5488778  | -1.462040072 | -0.131109254 | Vsx1               |
| chrX  | 16111356 | 16112356 | -1.466784732 | -0.411340307 | disco              |
| chr2R | 7362305  | 7363305  | -1.470632037 | -0.36987238  | inv                |
| chrX  | 9587591  | 9588591  | -1.489107614 | -0.006431672 | btd                |
| chr3R | 12795584 | 12796584 | -1.490959802 | 0.148710004  | Abd-B (iab9-PRE?)  |
| chr3L | 1177848  | 1178848  | -1.493803855 | -0.604312284 | bab2               |
| chr2L | 20770009 | 20771009 | -1.501890395 | 0.103488448  | cad                |
| chr2R | 3918315  | 3919315  | -1.520977207 | -0.21760822  | Optix              |
| chr2L | 11447125 | 11448125 | -1.542027808 | -0.20517641  | salm               |
| chr3L | 6981574  | 6982574  | -1.562343182 | -0.430092093 | bin                |
| chr3R | 4158984  | 4159984  | -1.59070818  | -0.310213444 | Poxm               |
| chr2R | 3905947  | 3906947  | -1.59727804  | -0.179511956 | Optix              |
| chr2R | 7356552  | 7357552  | -1.604264923 | -0.191580119 | inv                |
| chr3R | 2788820  | 2789820  | -1.60541527  | -0.045021655 | Antp               |
| chr2L | 20782896 | 20783896 | -1.625062679 | 0.323662745  | cad                |
| chr3R | 12528230 | 12529230 | -1.638650324 | 0.143139099  | Ubx (bx-PRE)       |
| chrX  | 17662071 | 17663071 | -1.642867006 | -0.617593942 | unc-4              |
| chr3R | 2738487  | 2739487  | -1.644558646 | -0.3350898   | Antp               |
| chr3L | 377833   | 378833   | -1.653789164 | -0.54880123  | trh                |
| chr3R | 2826134  | 2827134  | -1.654004762 | -0.331055168 | Antp               |
| chr3R | 12672528 | 12673528 | -1.677201837 | 0.156035662  | abd-A (iab4-PRE)   |
| chr2R | 11558873 | 11559873 | -1.691425089 | -0.481582105 | fus                |
| chr3R | 12655438 | 12656438 | -1.715390317 | -0.222313155 | abd-A (iab3 PRE)   |
| chr3R | 2862935  | 2863935  | -1.721605897 | -0.50560921  | Antp               |
| chr3R | 12707691 | 12708691 | -1.741765471 | -0.238736092 | Abd-B (Fab6-PRE)   |
| chr3R | 12695158 | 12696158 | -1.753221504 | 0.007045643  | Abd-B (Mcp-PRE)    |
| chr3R | 6447771  | 6448771  | -1.809855281 | -0.880848309 | hth                |
| chr2R | 10678120 | 10679120 | -1.825251803 | -0.533463981 | kn                 |
| chr4  | 724688   | 725688   | -1.836627001 | -0.936932414 | ey                 |
| chr3R | 12637297 | 12638297 | -1.854100047 | -0.326804773 | abd-A (iab2-PRE)   |

|       |         |         |              |              |         |
|-------|---------|---------|--------------|--------------|---------|
| chr3R | 2755700 | 2756700 | -1.868966644 | -0.423310675 | Antp    |
| chr2L | 1643905 | 1644905 | -1.893941094 | -0.032727707 | CG31666 |

\* The coordinates are in Dm3, 2006 genome release

**Table S4. Inverse-PCR mapping of Doc transgenes**

| <b>Fly line</b>           | <b>Chromosome arm</b> | <b>Coordinates (2006)</b> |
|---------------------------|-----------------------|---------------------------|
| Doc1 line 1 (DocF3s1-1B)  | 2L                    | 9437447                   |
| Doc1 line 2 (DocF3s1-4)   | 2R                    | 2544882                   |
| Doc3 line 1 (DocF11s1-3)  | 2R                    | 13340141                  |
| Doc3 line 2 (DocF11s1-9)  | 2R                    | repeated sequence         |
| Doc3 line 3 (DocF11s1-10) | 2L                    | 5986350                   |



**Table S5. Relative differences in E(z) ChIP-seq signals between Su(z)2-1.b8 and Ras3 cells at PRE defined from Ras binding profiles.**

| PRE position* |          |          | Relative difference in sequencing reads between Su(z)2-1.b8 and Ras3 cells (average for two biological replicates) | corrsponding PcG target gene |
|---------------|----------|----------|--------------------------------------------------------------------------------------------------------------------|------------------------------|
| chromosome    | start    | stop     | for E(z) ChIP samples                                                                                              |                              |
| chr2L         | 15111370 | 15111629 | 0.39023719                                                                                                         | CG15269                      |
| chr2R         | 20230030 | 20230389 | 0.097082462                                                                                                        | bs                           |
| chr3L         | 9034052  | 9034592  | -0.14617106                                                                                                        | Doc1                         |
| chr3R         | 12239531 | 12239850 | -0.24052466                                                                                                        | ss                           |
| chr3L         | 7940956  | 7941380  | -0.240958254                                                                                                       | exex                         |
| chr3L         | 19675986 | 19676442 | -0.286802832                                                                                                       | CG8765                       |
| chr3L         | 20614693 | 20615295 | -0.308328587                                                                                                       | knrl                         |
| chr3R         | 20920230 | 20920721 | -0.342738266                                                                                                       | fd96cb                       |
| chr2R         | 13709652 | 13710298 | -0.445441055                                                                                                       | grh                          |
| chr3R         | 17204398 | 17204885 | -0.458656895                                                                                                       | tin                          |
| chr3R         | 9702800  | 9703291  | -0.502979906                                                                                                       | E5                           |
| chr2R         | 18129365 | 18131598 | -0.506306242                                                                                                       | dve                          |
| chr3R         | 677857   | 678677   | -0.530265844                                                                                                       | opa                          |
| chr2L         | 18881127 | 18881948 | -0.563348014                                                                                                       | tup                          |
| chrX          | 9623038  | 9623675  | -0.569935632                                                                                                       | Sp1                          |
| chr3L         | 6782832  | 6783343  | -0.573247034                                                                                                       | vvl                          |
| chr3L         | 9012224  | 9012809  | -0.584378297                                                                                                       | Doc2                         |
| chr3R         | 12248987 | 12249461 | -0.590498191                                                                                                       | ss                           |
| chr2L         | 1972535  | 1973141  | -0.599212497                                                                                                       | CG31670                      |
| chrX          | 18206421 | 18207101 | -0.605567312                                                                                                       | CG6023                       |
| chr3R         | 17387277 | 17387727 | -0.624059626                                                                                                       | slou                         |
| chr3R         | 7197778  | 7198569  | -0.632572911                                                                                                       | pros                         |
| chr3R         | 8070262  | 8070471  | -0.632583506                                                                                                       | Cyp313a3                     |
| chr3L         | 14170572 | 14171296 | -0.638136678                                                                                                       | D                            |
| chr2R         | 19508883 | 19509297 | -0.641957867                                                                                                       | CG4019                       |
| chr3R         | 7179101  | 7179685  | -0.650022226                                                                                                       | Pros                         |
| chrX          | 4305279  | 4305881  | -0.651350319                                                                                                       | bi                           |
| chr2R         | 10686390 | 10687325 | -0.683458384                                                                                                       | kn                           |
| chrX          | 2030869  | 2031272  | -0.687180361                                                                                                       | ph-p                         |
| chr2R         | 19519753 | 19520230 | -0.688653237                                                                                                       | retn                         |
| chr3L         | 12573211 | 12573895 | -0.704964319                                                                                                       | ara                          |
| chr3R         | 9727142  | 9727684  | -0.720880465                                                                                                       | ems                          |
| chr2R         | 5082303  | 5082822  | -0.722936592                                                                                                       | unpg                         |
| chr2L         | 3606489  | 3607094  | -0.729891722                                                                                                       | odd                          |
| chr3L         | 19656602 | 19657174 | -0.741318843                                                                                                       | tey                          |
| chr3L         | 11002127 | 11002699 | -0.776183243                                                                                                       | klu                          |
| chr3L         | 14571975 | 14572488 | -0.779625249                                                                                                       | HGTX                         |
| chr3R         | 2567233  | 2568185  | -0.779969275                                                                                                       | pb                           |
| chr2R         | 20701940 | 20702501 | -0.788538538                                                                                                       | Dll                          |
| chr2L         | 9581579  | 9582057  | -0.788917099                                                                                                       | gcm                          |
| chr2L         | 1970362  | 1970880  | -0.795800226                                                                                                       | Der-1                        |
| chr3R         | 8889743  | 8890347  | -0.796388378                                                                                                       | sim                          |
| chr3L         | 12426860 | 12427916 | -0.815657021                                                                                                       | toe                          |

|       |          |          |              |         |
|-------|----------|----------|--------------|---------|
| chr3R | 24410963 | 24411495 | -0.826656728 | fkf     |
| chr2L | 6536052  | 6536460  | -0.878202894 | eya     |
| chr3R | 26734766 | 26735163 | -0.885478507 | Ptx1    |
| chr3L | 3845713  | 3846205  | -0.890469205 | Awh     |
| chr2L | 3836502  | 3836947  | -0.913281728 | slp2    |
| chr3R | 8104718  | 8105185  | -0.915624086 | svp     |
| chr3R | 20906095 | 20906581 | -0.926565344 | fd96Ca  |
| chr2R | 7590518  | 7590890  | -0.928510088 | lr48b   |
| chr3R | 17325073 | 17325636 | -0.931964925 | C15     |
| chr3R | 13947195 | 13947817 | -0.939832875 | sr      |
| chr3R | 11818785 | 11819216 | -0.944052635 | srp     |
| chr2R | 5875793  | 5876217  | -0.948872185 | TER94   |
| chr2R | 21002813 | 21003424 | -0.949125027 | Tkr     |
| chr3R | 12229202 | 12229872 | -0.953218765 | ss      |
| chr2L | 3825334  | 3825786  | -0.959350661 | slp1    |
| chr2L | 6821575  | 6822111  | -0.959556678 | sens-2  |
| chr3R | 660947   | 661454   | -0.966717636 | CG14659 |
| chr3R | 9700578  | 9701217  | -0.970480185 | E5      |
| chr3L | 6896977  | 6897674  | -0.987929551 | Prat2   |
| chr3L | 14592606 | 14592965 | -0.988768668 | HGTX    |
| chrX  | 4318933  | 4319612  | -0.996803629 | bi      |
| chr3R | 6442415  | 6443105  | -1.008346711 | hth     |
| chr4  | 865042   | 865466   | -1.014007184 | Sox102F |
| chr2L | 21828179 | 21829074 | -1.016675409 | tsh     |
| chr3L | 12683858 | 12684198 | -1.021112415 | mirr    |
| chr3L | 14124711 | 14125162 | -1.026474249 | Sox21b  |
| chr2L | 3835245  | 3835644  | -1.031606053 | slp2    |
| chr3L | 12602287 | 12602933 | -1.037450207 | caup    |
| chr2R | 20949155 | 20949539 | -1.06871344  | gsb     |
| chr2R | 4955882  | 4956261  | -1.098051017 | ana     |
| chr3R | 13383183 | 13383577 | -1.100189853 | Hmx     |
| chrX  | 16042983 | 16043453 | -1.104408524 | disco-r |
| chrX  | 8518806  | 8519329  | -1.104908761 | oc      |
| chr3L | 21469508 | 21469951 | -1.108321801 | croc    |
| chr3R | 17285686 | 17286153 | -1.115292251 | lbe     |
| chr2L | 18936072 | 18936508 | -1.132586121 | ssp3    |
| chrX  | 16110595 | 16111958 | -1.134840138 | disco   |
| chr2R | 3305938  | 3307010  | -1.138185193 | so      |
| chr2R | 10345363 | 10346045 | -1.150461159 | Oaz     |
| chrX  | 4320592  | 4321328  | -1.165838586 | bi      |
| chrX  | 8699672  | 8701052  | -1.166939398 | Lim1    |
| chr3R | 3135271  | 3135724  | -1.167180226 | rn      |
| chrX  | 5895173  | 5895579  | -1.170667762 | CG4766  |
| chr3R | 11851519 | 11851955 | -1.173897328 | pnr     |
| chr3R | 17259805 | 17260339 | -1.17425819  | lbl     |
| chr3R | 4016498  | 4017064  | -1.175809259 | grn     |
| chr3R | 2675550  | 2676079  | -1.193688265 | Scr     |
| chr3R | 2504162  | 2504614  | -1.194994244 | lab     |
| chr2L | 11358486 | 11359050 | -1.195259699 | salr    |
| chr2R | 5866450  | 5866987  | -1.196194751 | eve     |

|       |          |          |              |         |
|-------|----------|----------|--------------|---------|
| chr3L | 8997832  | 8998243  | -1.199786184 | Doc3    |
| chr3L | 12460998 | 12461488 | -1.202986736 | eyg     |
| chr2L | 3662365  | 3662771  | -1.203261154 | CG34340 |
| chr3R | 8106425  | 8106941  | -1.208119217 | svp     |
| chr2R | 18933556 | 18933995 | -1.219306806 | twi     |
| chr2L | 18795879 | 18796691 | -1.222544203 | ham     |
| chr2L | 16485569 | 16486613 | -1.225800689 | CG4580  |
| chr3R | 4007014  | 4007779  | -1.226011975 | grn     |
| chrX  | 5907070  | 5907631  | -1.226463461 | mab-21  |
| chr2R | 16790893 | 16791490 | -1.230276343 | CG9235  |
| chr3R | 12759885 | 12760543 | -1.235296742 | Abd-B   |
| chr2L | 14490333 | 14490960 | -1.23784642  | noc     |
| chr3R | 727065   | 728091   | -1.238529284 | Gnf1    |
| chr3L | 12646172 | 12646652 | -1.240544024 | mirr    |
| chrX  | 8651821  | 8652367  | -1.242655553 | Lim1    |
| chr2L | 12617771 | 12618589 | -1.250687491 | nub     |
| chr4  | 525767   | 526194   | -1.254772257 | zfh2    |
| chr3R | 12589541 | 12590187 | -1.254781686 | Ubx     |
| chr3L | 21472713 | 21473185 | -1.271919049 | croc    |
| chr2R | 21102665 | 21103059 | -1.279815745 | Kr      |
| chr2L | 14410293 | 14410601 | -1.284363135 | eIB     |
| chr4  | 527867   | 529481   | -1.286536632 | zfh2    |
| chr3R | 24372820 | 24373322 | -1.292441226 | CG12413 |
| chr2R | 8771763  | 8772293  | -1.29991978  | vg      |
| chr2L | 5461114  | 5461728  | -1.302647643 | mid     |
| chr2L | 22024370 | 22024863 | -1.303100148 | tio     |
| chr2L | 5403461  | 5404105  | -1.304611626 | H15     |
| chr3L | 12685787 | 12686831 | -1.322299872 | mirr    |
| chr2R | 20939757 | 20940389 | -1.324643766 | gsb-n   |
| chr3R | 2674234  | 2674740  | -1.332825378 | Scr     |
| chr2L | 3534112  | 3534582  | -1.339629155 | Che-13  |
| chr3R | 6490660  | 6491189  | -1.343719028 | CG6465  |
| chr2L | 12085706 | 12086181 | -1.34465627  | prd     |
| chr2L | 12586850 | 12587329 | -1.345972545 | nub     |
| chrX  | 9586690  | 9586981  | -1.349307856 | btd     |
| chr2L | 7306724  | 7307264  | -1.351508645 | wg      |
| chr2L | 8825080  | 8825767  | -1.361789892 | SoxN    |
| chr2L | 6833488  | 6834186  | -1.364783832 | sens-2  |
| chr2L | 2448488  | 2448834  | -1.366897304 | dpp     |
| chr3R | 17272003 | 17272609 | -1.366917594 | lbe     |
| chrX  | 16041494 | 16042385 | -1.369688863 | disco-r |
| chr3R | 2718729  | 2719334  | -1.375561182 | Antp    |
| chr2L | 5421448  | 5422074  | -1.380129374 | H15     |
| chr3R | 26738009 | 26738594 | -1.382238539 | Ptx1    |
| chr3R | 2617134  | 2617676  | -1.387264582 | Dfd     |
| chr2R | 8791707  | 8792326  | -1.391011281 | vg      |
| chr2L | 3538616  | 3540427  | -1.3956134   | drm     |
| chr3L | 21577865 | 21578245 | -1.401707326 | CG32441 |
| chr2L | 12655656 | 12656153 | -1.402615125 | pdm2    |
| chr2L | 16422631 | 16423088 | -1.408947542 | CG5888  |

|       |          |          |              |          |
|-------|----------|----------|--------------|----------|
| chr2R | 1614207  | 1614794  | -1.420292367 | ap       |
| chr2R | 7415312  | 7416124  | -1.42328651  | en       |
| chrX  | 8544621  | 8545319  | -1.4339559   | oc       |
| chr2L | 11445453 | 11446449 | -1.435275166 | salm     |
| chr2R | 15156175 | 15156766 | -1.436296383 | rib      |
| chr3R | 25381690 | 25382269 | -1.443296348 | Dr       |
| chr2R | 7416925  | 7417442  | -1.44756059  | en       |
| chrX  | 5454368  | 5455107  | -1.449234258 | Vsx2     |
| chr2L | 594614   | 595200   | -1.449634414 | Gsc      |
| chrX  | 8555081  | 8555314  | -1.454787513 | oc       |
| chrX  | 5487826  | 5488404  | -1.462040072 | Vsx1     |
| chr2R | 10095712 | 10096104 | -1.464666682 | Sox15    |
| chr2R | 7362838  | 7363393  | -1.470632037 | inv      |
| chrX  | 17683493 | 17684642 | -1.476072804 | OdsH     |
| chrX  | 9587718  | 9588331  | -1.489107614 | btd      |
| chr3R | 12795794 | 12796107 | -1.490959802 | Abd-B    |
| chr3L | 1178008  | 1178721  | -1.493803855 | bab2     |
| chr2L | 20770305 | 20770807 | -1.501890395 | cad      |
| chr2L | 21846895 | 21847955 | -1.502817677 | tsh      |
| chr2R | 19525454 | 19525805 | -1.516203422 | retn     |
| chr3R | 12785972 | 12786253 | -1.528319113 | Abd-B    |
| chr2R | 3918206  | 3918846  | -1.531289803 | Optix    |
| chr2R | 3911853  | 3912257  | -1.535273189 | Optix    |
| chr3R | 3762459  | 3762987  | -1.548344359 | dsx      |
| chr2L | 11447479 | 11447998 | -1.552501955 | salm     |
| chr3L | 21591366 | 21591957 | -1.554870727 | AP-2     |
| chr3L | 6981892  | 6982893  | -1.562343182 | bin      |
| chrX  | 8510738  | 8510965  | -1.570163102 | Caf1-180 |
| chrX  | 20561468 | 20561871 | -1.590519053 | run      |
| chr3R | 4159369  | 4160504  | -1.59070818  | Poxm     |
| chr2R | 3906184  | 3906830  | -1.59727804  | CG14762  |
| chr2R | 7356866  | 7357359  | -1.604264923 | E(Pc)    |
| chr3R | 19026683 | 19027209 | -1.615101071 | cnc      |
| chr3R | 3788356  | 3789630  | -1.621508636 | dsx      |
| chr2L | 20783064 | 20783522 | -1.625062679 | cad      |
| chr3R | 12528467 | 12529058 | -1.638650324 | Ubx      |
| chrX  | 17661972 | 17662715 | -1.642867006 | unc-4    |
| chr3R | 2738495  | 2739016  | -1.644558646 | Antp     |
| chr3L | 377257   | 378559   | -1.653789164 | trh      |
| chr3R | 2826238  | 2827042  | -1.654004762 | Antp     |
| chr2L | 7358858  | 7359156  | -1.656310895 | Wnt6     |
| chr3R | 12712222 | 12712538 | -1.669939736 | Abd-B    |
| chr3R | 12672842 | 12673391 | -1.677201837 | iab-4    |
| chrX  | 5473621  | 5473839  | -1.683410509 | Vsx1     |
| chr3R | 12746086 | 12746508 | -1.689063127 | Abd-B    |
| chr2R | 11559081 | 11559392 | -1.691425089 | fus      |
| chr3R | 12655674 | 12656150 | -1.715390317 | Abd-A    |
| chr3R | 2862836  | 2863512  | -1.721605897 | CG1979   |
| chr3R | 12725360 | 12725896 | -1.729197434 | Abd-B    |
| chr2R | 20732353 | 20732594 | -1.737368487 | CG3650   |

|       |          |          |              |                  |
|-------|----------|----------|--------------|------------------|
| chr3R | 12708034 | 12708699 | -1.741765471 | Abd-B            |
| chr2R | 15141546 | 15141993 | -1.750744739 | CG33453          |
| chrX  | 17291103 | 17291554 | -1.753073657 | B-H1             |
| chr3R | 12695005 | 12695448 | -1.753221504 | iab-4            |
| chr3L | 5603715  | 5604061  | -1.784184103 | Eaf6             |
| chr3R | 6447868  | 6448326  | -1.809855281 | hth              |
| chr3R | 12774197 | 12774737 | -1.811020717 | Abd-B            |
| chr3L | 5884125  | 5884488  | -1.819843841 | DNApol-epsilon58 |
| chr3R | 2817688  | 2817988  | -1.825223321 | Antp             |
| chr2R | 10678011 | 10678429 | -1.825251803 | kn               |
| chr4  | 724472   | 725443   | -1.833016621 | ey               |
| chr3R | 12637409 | 12637938 | -1.854100047 | Abd-A            |
| chr3R | 2756103  | 2756553  | -1.868966644 | Antp             |
| chr3R | 2729200  | 2729631  | -1.874411903 | Antp             |
| chr2R | 15162777 | 15163289 | -1.882906155 | rib              |
| chr4  | 1010061  | 1010437  | -1.913024715 | toy              |
| chr2L | 1669607  | 1670095  | -1.936337247 | chinmo           |
| chr2L | 1644318  | 1644745  | -1.947360705 | CG31666          |

\* The coordinates are in Dm3, 2006 genome release
